# Supplementary material for: Stereochemical determination of dictyostatin, a novel microtubule-stabilising macrolide from the marine sponge Corallistidae sp.Electronic supplementary information (ESI) available: copies of 1D and 2D NMR spectra, tables of spectral data and calculated torsion angles. See http://www.rsc.org/suppdata/cc/b3/b316390c/
Source: Royal Society of Chemistry journal article supplement (doi:10.1039/b316390c), 2004-01-01
Supplement: b316390c.pdf [file b316390c.pdf]

## **Stereochemical Determination of Dictyostatin, a Novel Microtubule-Stabilising Macrolide from the Marine Sponge *Corallistidae* sp.**

Ian Paterson,<sup>\*a</sup> Robert Britton,<sup>a</sup> Oscar Delgado<sup>a</sup> and Amy Wright<sup>b</sup>

<sup>a</sup> *University Chemical Laboratory, Lensfield Road, Cambridge CB2 1EW, UK. Fax: +44 1223 336362; Tel: +44 1223 336407; E-mail: [ip100@cam.ac.uk](mailto:ip100@cam.ac.uk)*

<sup>b</sup> *Harbor Branch Oceanographic Institution, Fort Pierce, Florida, USA, 34946. Fax: +1 772 461 2221; Tel: +1 772 465 2400; E-mail: [Wright@HBOI.edu](mailto:Wright@HBOI.edu)*

### **General experimental:**

Nuclear magnetic resonance (NMR) spectra were recorded on a Bruker Avance 700 spectrometer operating at a proton frequency of 700.03 MHz. Proton spectra were referenced to 3.34 ppm for residual CHD<sub>2</sub>OD. The NOESY experiment was acquired in approximately 4 hours with a mixing time of 600 msec. Acquisition parameters included 4K data points in F<sub>2</sub> and 768 increments with 8 scans per increment. The data was zero filled to 1K in F<sub>1</sub> for processing. The HSCQ-HECADE experiment was acquired in approximately 75 hours with a TOCSY mixing time of 60 msec and a *J*(scale) factor of 1. The acquisition parameters included 8K data points in F<sub>2</sub> and 768 increments with 108 scans per increment. The data was zero-filled to 16K in F<sub>2</sub> and 2K in F<sub>1</sub> for processing.

Molecular modelling studies were performed on potential diastereomers of dictyostatin using Macromodel (version 7.2) and the MM2\* force field, together with the generalised Born/Surface area (GB/SA) water solvent model. Structures were subjected to a minimisation procedure to the nearest local minimum prior to the generation of new low energy conformers by Monte Carlo searching (10000 steps). All conformations within 50 kJ mol<sup>-1</sup> of the lowest energy structure were recorded. The normal set-up protocol was employed, with experiments sampling batches of 1000 to 2000 structures.

**Table 1. <sup>1</sup>H- NMR data and NOESY Correlations  
(700 MHz, CD<sub>3</sub>OD)**

| Proton No. | Chemical Shift (ppm) and Multiplicity (H-z) | NOESY Correlations <sup>s</sup>                                          |
|------------|---------------------------------------------|--------------------------------------------------------------------------|
| 2          | 5.55 (d, 11.5)                              | H-3 (s)                                                                  |
| 3          | 6.64 (dd, 11.5, 11.5)                       | H-2 (s), H-5 (s)                                                         |
| 4          | 7.20 (dd, 15.7, 11.5)                       | Me-6 (vs), H-6 (m), Me-20 (m), H-23 (w), H-8b (w), H-20 (w)              |
| 5          | 6.17 (dd, 15.7, 6.7)                        | H-3 (s), H-6 (s), H-7 (m), Me-6 (w)                                      |
| 6          | 2.59 (ddq (6.7, 4.0, 6.9)                   | H-5 (s), H-7 (s), H-4 (m)                                                |
| 7          | 4.04 (ddd, 10.6, 4.0, 2.7)                  | H-6 (s), H-8b (s), H-5 (m), Me-6 (m), H-9 (w)                            |
| 8a         | 1.49 (ddd, 14.0, 10.6, 3.3)                 | H-9 (s), H-6 (w), H-10 (w), H-12 (w)                                     |
| 8b         | 1.41 (ddd, 14.0, 10.1, 2.7)                 | H-7 (s), H-6 (m), H-9 (m), H-10 (m)                                      |
| 9          | 4.64 (dddd, 10.1, 9.5, 3.3, 0.8)            | H-8a (s), H-12 (vs), H-8b (m), Me-12 (m)                                 |
| 10         | 5.40 (dd, 11.1, 9.5)                        | H-11 (s), H-8b (m), H-8a (w)                                             |
| 11         | 5.55 (ddd, 11.1, 11.1, 0.8)                 | H-14 (s), H-13 (w), Me-12 (w)                                            |
| 12         | 2.75 (ddq, 11.1, 3.1, 7.0)                  | H-9 (vs), H-13 (s), H-15a (vs), H-11 (w)                                 |
| 13         | 3.09 (dd, 8.0, 3.1)                         | H-12 (s), H-14 (s), H-15b (s), Me-12 (s), H-11 (w), H-15a (m), Me-14 (m) |
| 14         | 1.59 (dddq, 11.2, 8.0, 3.8, 6.5)            | H-11 (s), H-13 (w)                                                       |
| 15a        | 1.24 (ddd, 13.8, 10.3, 3.8)                 | H-12 (vs), H-17b (s), H-13 (w)                                           |
| 15b        | 0.89 (ddd, 13.8, 11.2, 3.8)                 | H-13 (s)                                                                 |
| 16         | 1.53 (m)                                    |                                                                          |
| 17a        | 1.57 (m)                                    |                                                                          |
| 17b        | 0.69 (dddd, 12.8, 12.8, 9.0, 4.7)           | H-20 (vs), H-15a (s), H-18a (s) H-19 (s)                                 |
| 18a        | 1.83 (dddd, 12.8, 12.8, 5.8, 4.7)           | H-19 (s), H-17b (s), H-21 (s), H-15b (s)                                 |
| 18b        | 1.10 (m)                                    |                                                                          |
| 19         | 3.34 (ddd, 2.0, 5.8, 5.8)                   | H-20 (s), H-22 (s), H-17b (m), H-18a (m), H-21 (w), H-25 (w)             |
| 20         | 1.88 (ddq, 5.8, 5.1, 6.9)                   | H-19 (s), H-21 (s), H-17b (s), Me-22 (s), H-18a (m), H-23 (w), H-4 (w)   |
| 21         | 5.13 (dd, 6.9, 5.1)                         | H-18a (s), H-20 (s), Me-22 (s), H-21 (s), Me-20 (m), H-19 (w)            |
| 22         | 3.16 (ddq, 10.6, 6.9, 6.8)                  | H-25 (vs), Me-20 (s), H-19 (s), H-21 (m), H-23 (w)                       |
| 23         | 5.32 (dd, 11.1, 10.6)                       | H-24 (vs), Me-22 (s), H-21 (s), H-20 (m), H-22 (w)                       |
| 24         | 6.05 (dd, 11.1, 11.1)                       | H-23 (vs), H-26a (s), H-25 (w)                                           |
| 25         | 6.70 (ddd, 16.8, 11.1, 10.3)                | H-22 (vs), H-19 (w)                                                      |
| 26a        | 5.24 (dd, 16.8, 2.1)                        | H-24 (s), H-26b (s)                                                      |
| 26b        | 5.14 (dd, 10.3, 2.1)                        | H-26a (s) H-25 (m)                                                       |
| Me-6       | 1.14 (d, 6.9)                               |                                                                          |
| Me-12      | 1.12 (d, 7.0)                               |                                                                          |
| Me-14      | 0.94 (d, 6.5)                               | H-13 (m)                                                                 |
| Me-16      | 0.92 (d, 6.6)                               | H-15a (m)                                                                |
| Me-20      | 1.06 (d, 6.9)                               | H-22 (s), H-4 (m), H-19 (m), H-21 (m)                                    |
| Me-22      | 1.00 (d, 6.8)                               |                                                                          |

<sup>a</sup> definitions: (s) = strong, (m) = medium, (w) = weak.

**Table 2. Relevant Homonuclear and Heteronuclear Coupling Constants (700 MHz, CD<sub>3</sub>OD)**

| Proton No. | Chemical Shift (ppm) and Multiplicity (Hz) | <sup>2</sup> J <sub>H,C</sub> (Hz) <sup>a</sup> | <sup>3</sup> J <sub>H,C</sub> (Hz) <sup>a</sup> |
|------------|--------------------------------------------|-------------------------------------------------|-------------------------------------------------|
| 2          | 5.55 (d, 11.5)                             |                                                 | C-4 (9.8)                                       |
| 3          | 6.64 (dd, 11.5, 11.5)                      |                                                 | C-5 (5.7)                                       |
| 4          | 7.20 (dd, 15.7, 11.5)                      |                                                 | C-2 (3.1), C-6 (5.0)                            |
| 5          | 6.17 (dd, 15.7, 6.7)                       |                                                 | C-3 (8.6), Me-6 (5.5)                           |
| 6          | 2.59 (ddq (6.7, 4.0, 6.9)                  | C-7 (5.9)                                       |                                                 |
| 7          | 4.04 (ddd, 10.6, 4.0, 2.7)                 |                                                 | C-9 (2.8), Me-6 (4.9)                           |
| 8a         | 1.49 (ddd, 14.0, 10.6, 3.3)                | C-7 (6.1), C-9 (1.0)                            | C-10 (0.8)                                      |
| 8b         | 1.41 (ddd, 14.0, 10.1, 2.7)                | C-7 (0.5), C-9 (6.0)                            | C-10 (3.8)                                      |
| 9          | 4.64 (dddd, 10.1, 9.5, 3.3, 0.8)           |                                                 | C-7 (2.3), C-11 (3.7)                           |
| 10         | 5.40 (dd, 11.1, 9.5)                       | C-9 (0.6)                                       | C-8 (1.5), C-12 (8.7)                           |
| 11         | 5.55 (ddd, 11.1, 11.1, 0.8)                |                                                 | C-9 (11.1), Me-12 (2.2)                         |
| 12         | 2.75 (ddq, 11.1, 3.1, 7.0)                 | C-13 (1.1)                                      | C-10 (3.5)                                      |
| 13         | 3.09 (dd, 8.0, 3.1)                        |                                                 | C-15 (1.4), Me-12 (2.2), Me-14 (3.4)            |
| 14         | 1.59 (dddq, 11.2, 8.0, 3.8, 6.5)           | C-13 (5.7)                                      |                                                 |
| 15a        | 1.24 (ddd, 13.8, 10.3, 3.8)                |                                                 | C-13 (2.7), Me-14 (8.2), Me-16 (2.7)            |
| 15b        | 0.89 (ddd, 13.8, 11.2, 3.8)                |                                                 | C-13 (0.8), Me-16 (3.3)                         |
| 16         | 1.53 (m)                                   |                                                 |                                                 |
| 17a        | 1.57 (m)                                   |                                                 |                                                 |
| 17b        | 0.69 (dddd, 12.8, 12.8, 9.0, 4.7)          |                                                 |                                                 |
| 18a        | 1.83 (dddd, 12.8, 12.8, 5.8, 4.7)          |                                                 |                                                 |
| 18b        | 1.10 (m)                                   | C-19 (6.1)                                      |                                                 |
| 19         | 3.34 (ddd, 2.0, 5.8, 5.8)                  |                                                 | Me-20 (4.3)                                     |
| 20         | 1.88 (ddq, 5.8, 5.1, 6.9)                  | C-21 (2.9)                                      |                                                 |
| 21         | 5.13 (dd, 6.9, 5.1)                        |                                                 | C-23 (0.2), Me-20 (4.7), Me-22 (1.9)            |
| 22         | 3.16 (ddq, 10.6, 6.9, 6.8)                 | C-21 (6.9)                                      |                                                 |
| 23         | 5.32 (dd, 11.1, 10.6)                      |                                                 | C-21 (2.1), Me-22 (3.8)                         |
| 24         | 6.05 (dd, 11.1, 11.1)                      |                                                 | C-22 (9.0)                                      |
| 25         | 6.70 (ddd, 16.8, 11.1, 10.3)               |                                                 | C-23 (4.2)                                      |
| 26a        | 5.24 (dd, 16.8, 2.1)                       |                                                 |                                                 |
| 26b        | 5.14 (dd, 10.3, 2.1)                       |                                                 |                                                 |

<sup>a</sup> Couplings determined by HSQC-HECADE at both 800 MHz and 700 MHz.

**Table 3. Dihedral angles for lowest energy conformation of dictyostatin (5), calculated and measured  $^3J_{H,H}$  coupling constants in CD<sub>3</sub>OD.**

| H-H fragment | Dihedral angle | Calc. $^3J_{H,H}$ (Hz) | Exp. $^3J_{H,H}$ (Hz) |
|--------------|----------------|------------------------|-----------------------|
| H5 to H6     | 174.9          | 11.1                   | 6.7                   |
| H6 to H7     | 59.3           | 1.8                    | 4.0                   |
| H7 to H8a    | 164.6          | 11.3                   | 10.6                  |
| H7 to H8b    | 79.7           | 1.0                    | 2.7                   |
| H8a to H9    | 46.2           | 4.0                    | 3.3                   |
| H8b to H9    | 68.9           | 1.4                    | 10.1                  |
| H9 to H10    | 129.0          | 5.6                    | 9.5                   |
| H10 to H11   | 0.3            | 9.4                    | 11.1                  |
| H11 to H12   | 178.6          | 11.2                   | 11.1                  |
| H12 to H13   | 65.6           | 1.2                    | 3.1                   |
| H13 to H14   | 167.6          | 9.8                    | 8.0                   |
| H14 to H15a  | 61.1           | 3.0                    | 3.8                   |
| H14 to H15b  | 176.4          | 12.3                   | 11.2                  |
| H15a to H16  | 174.3          | 12.2                   | 10.3                  |
| H15b to H16  | 60.2           | 3.2                    | 3.8                   |
| H16 to H17a  | 61.7           | 3.0                    | Sm                    |
| H16 to H17b  | 178.5          | 12.3                   | 9.0                   |
| H17a to H18a | 172.8          | 12.8                   | 12.8                  |
| H17a to H18b | 71.3           | 1.6                    | Sm                    |
| H17b to H18a | 56.4           | 3.7                    | 4.7                   |
| H17b to H18b | 172.2          | 12.8                   | 12.8                  |
| H18a to H19  | 170.4          | 11.7                   | 5.8                   |
| H18b to H19  | 55.0           | 2.5                    | 2.0                   |
| H19 to H20   | 61.6           | 1.5                    | 5.8                   |
| H20 to H21   | 171.1          | 9.9                    | 4.9                   |

**<sup>1</sup>H NMR Spectrum of dictyostatin (5) in CD<sub>3</sub>OD (700 MHz)**

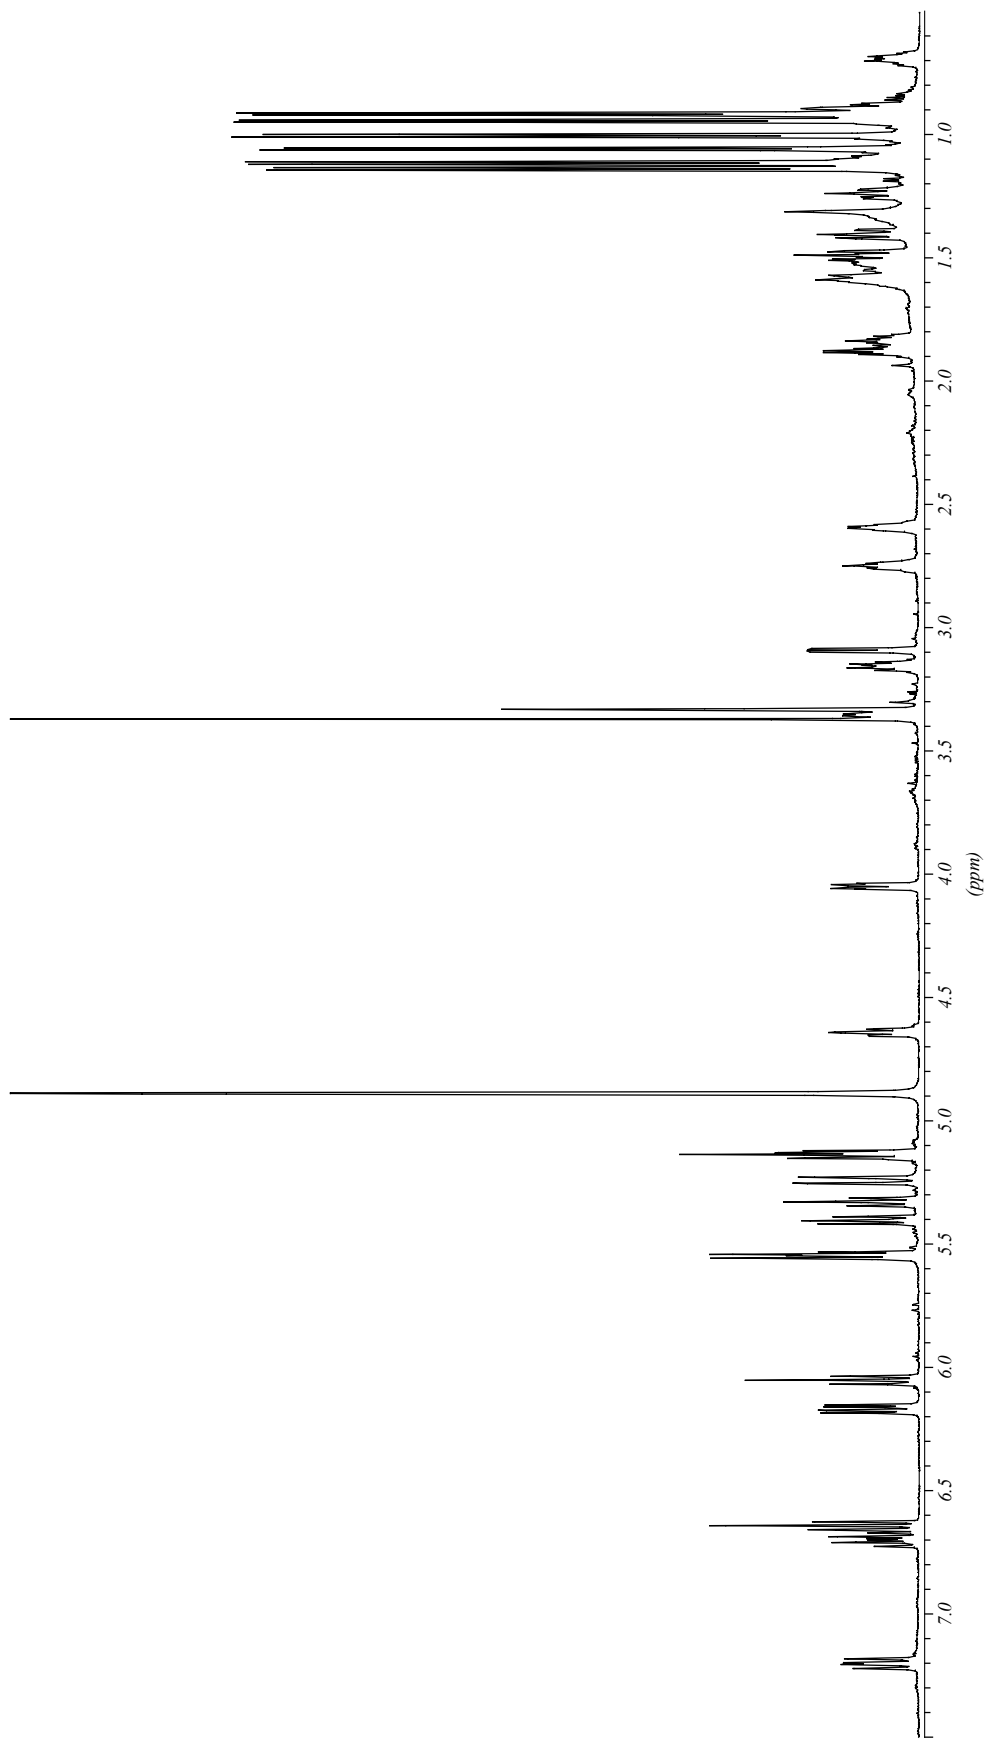

# NOESY Spectrum of dictyostatin (5) in CD<sub>3</sub>OD (700 MHz)

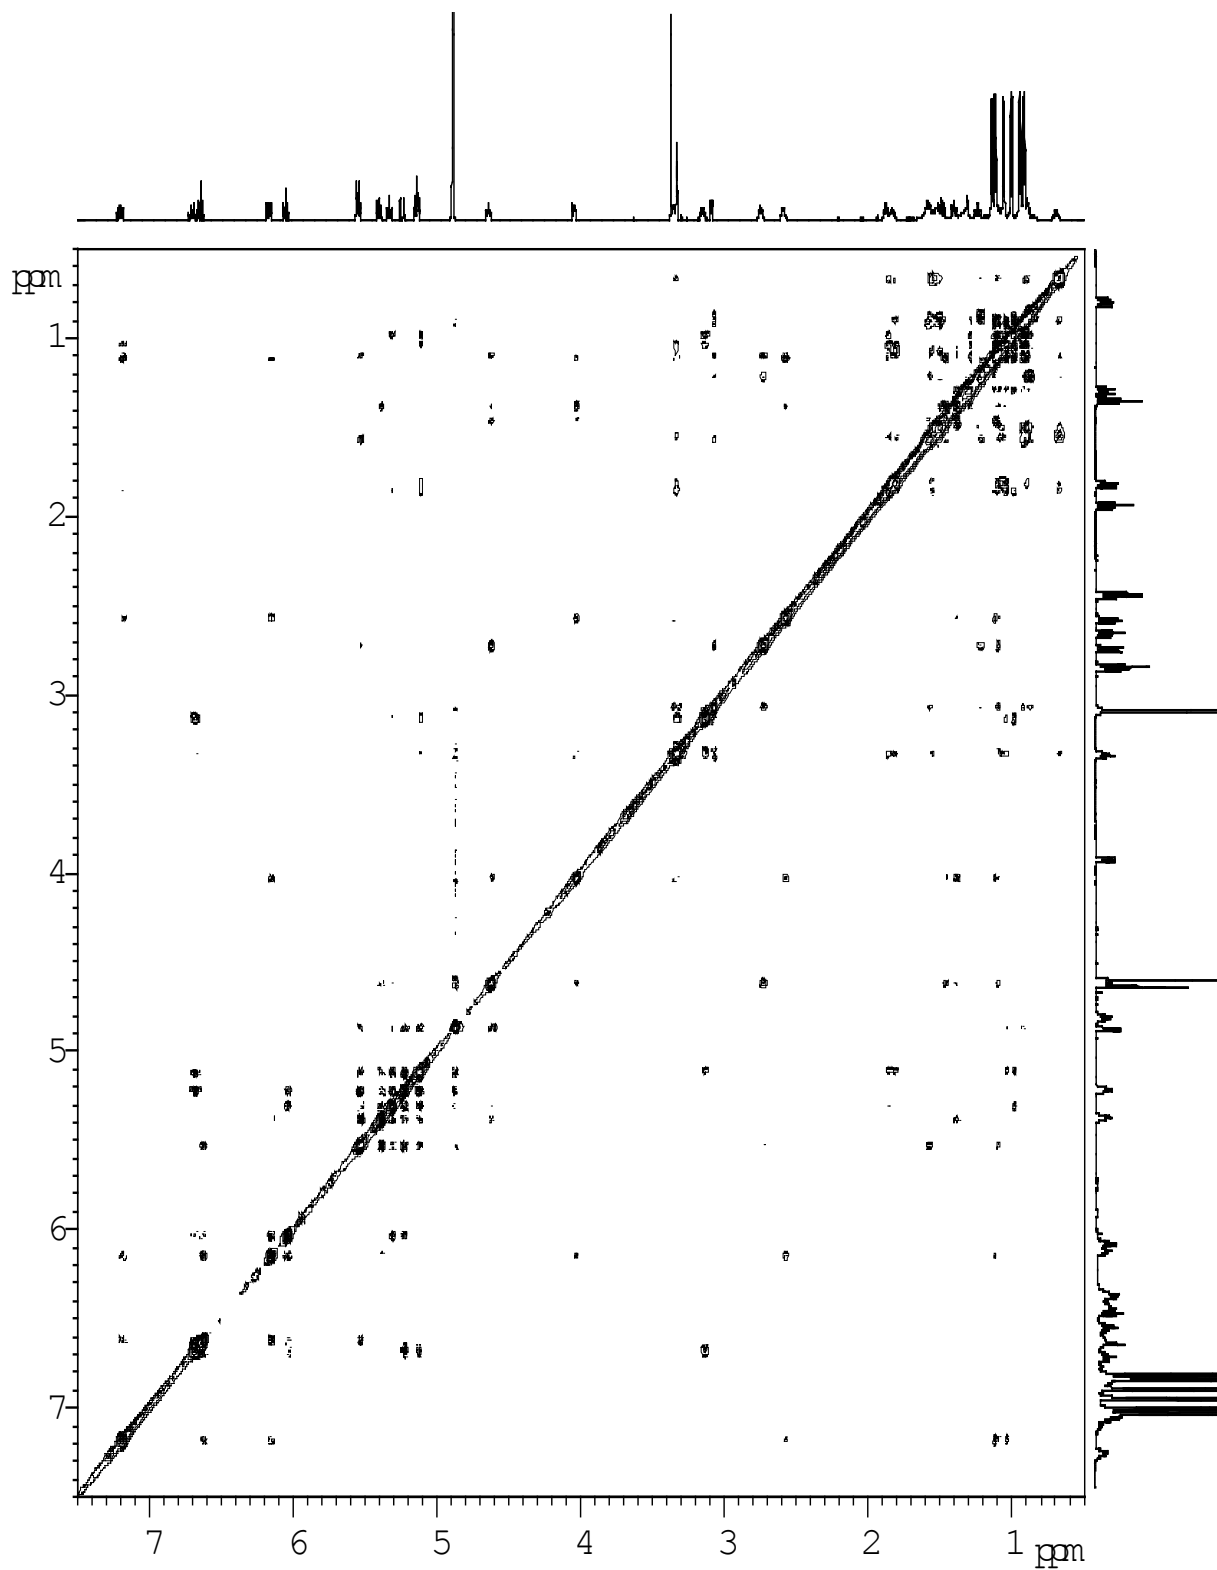

# HSQC-HECADE Spectrum of dictyostatin (5) in CD<sub>3</sub>OD (700 MHz)

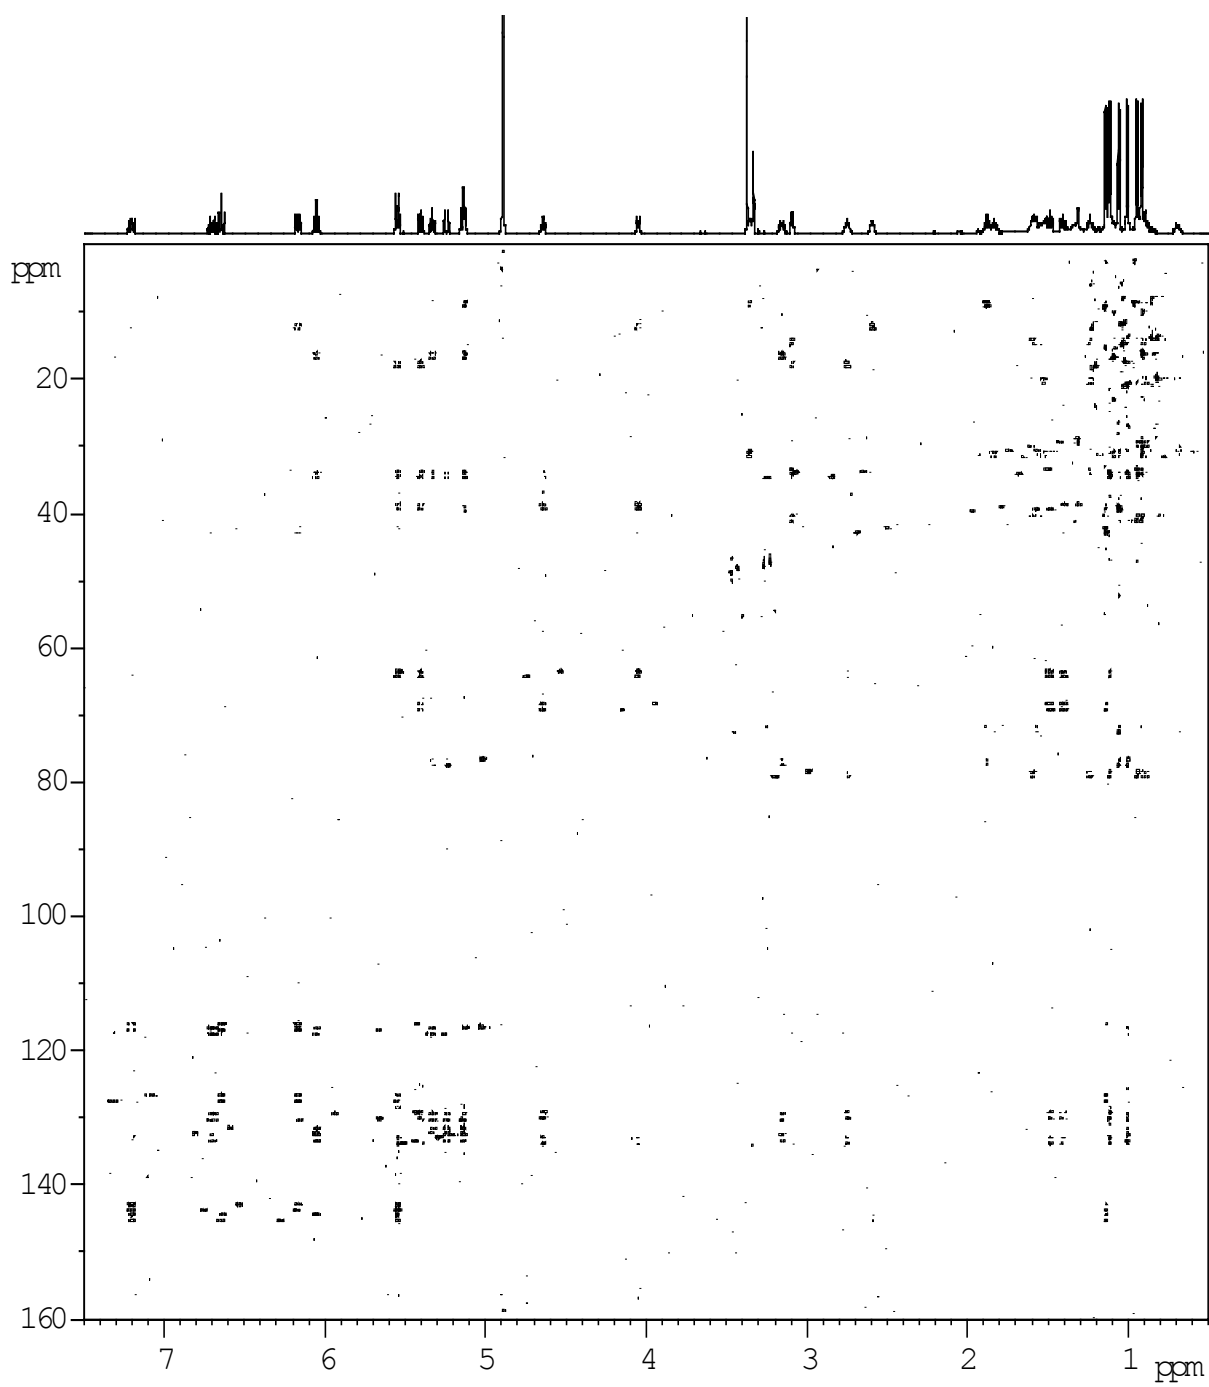

Perspective drawings of the lowest energy conformation of dictyostatin (5) generated by Macromodel V 8.0

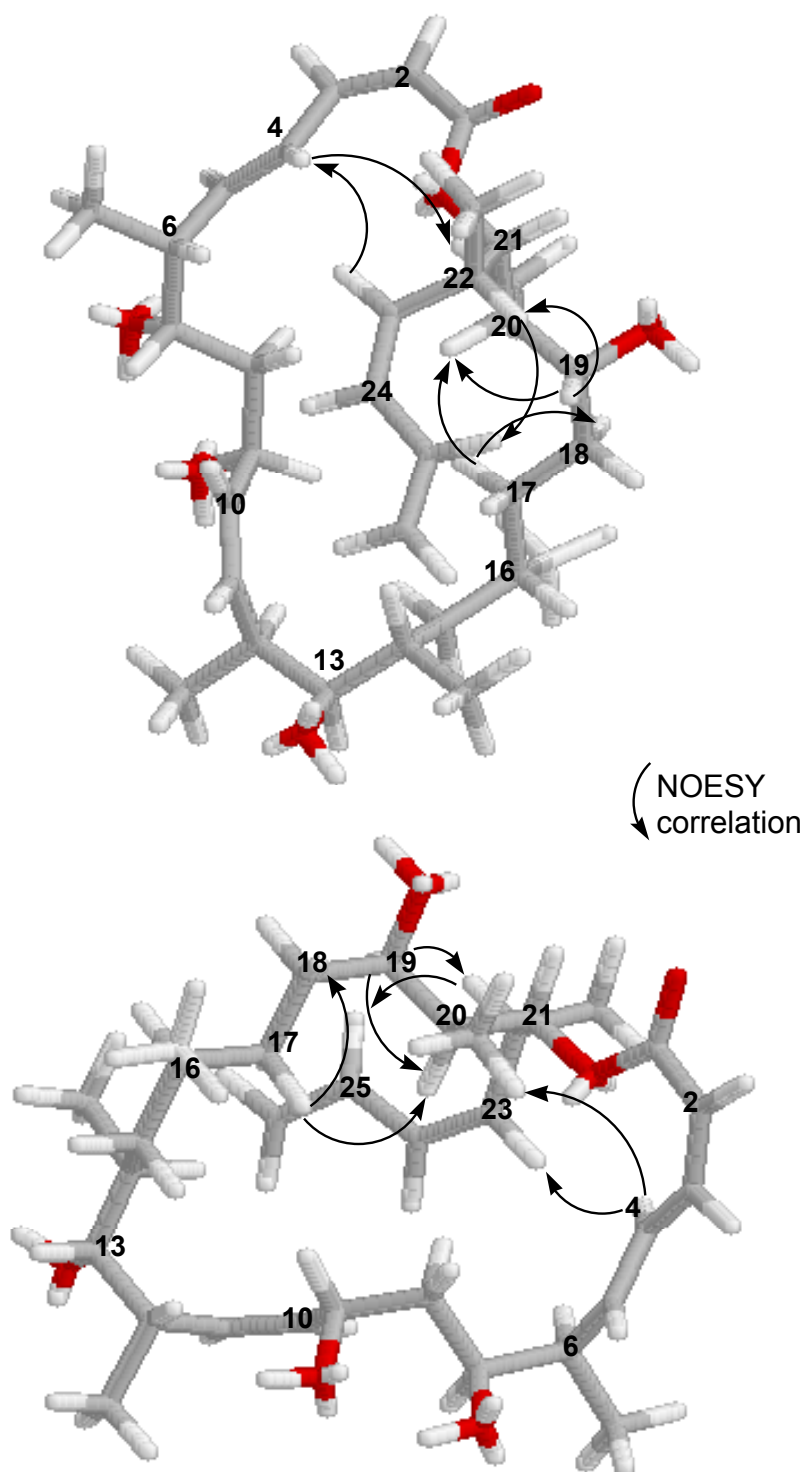



**Perspective drawings of the s-cis conformation of dictyostatin (4B) generated by Macromodel V 8.0**

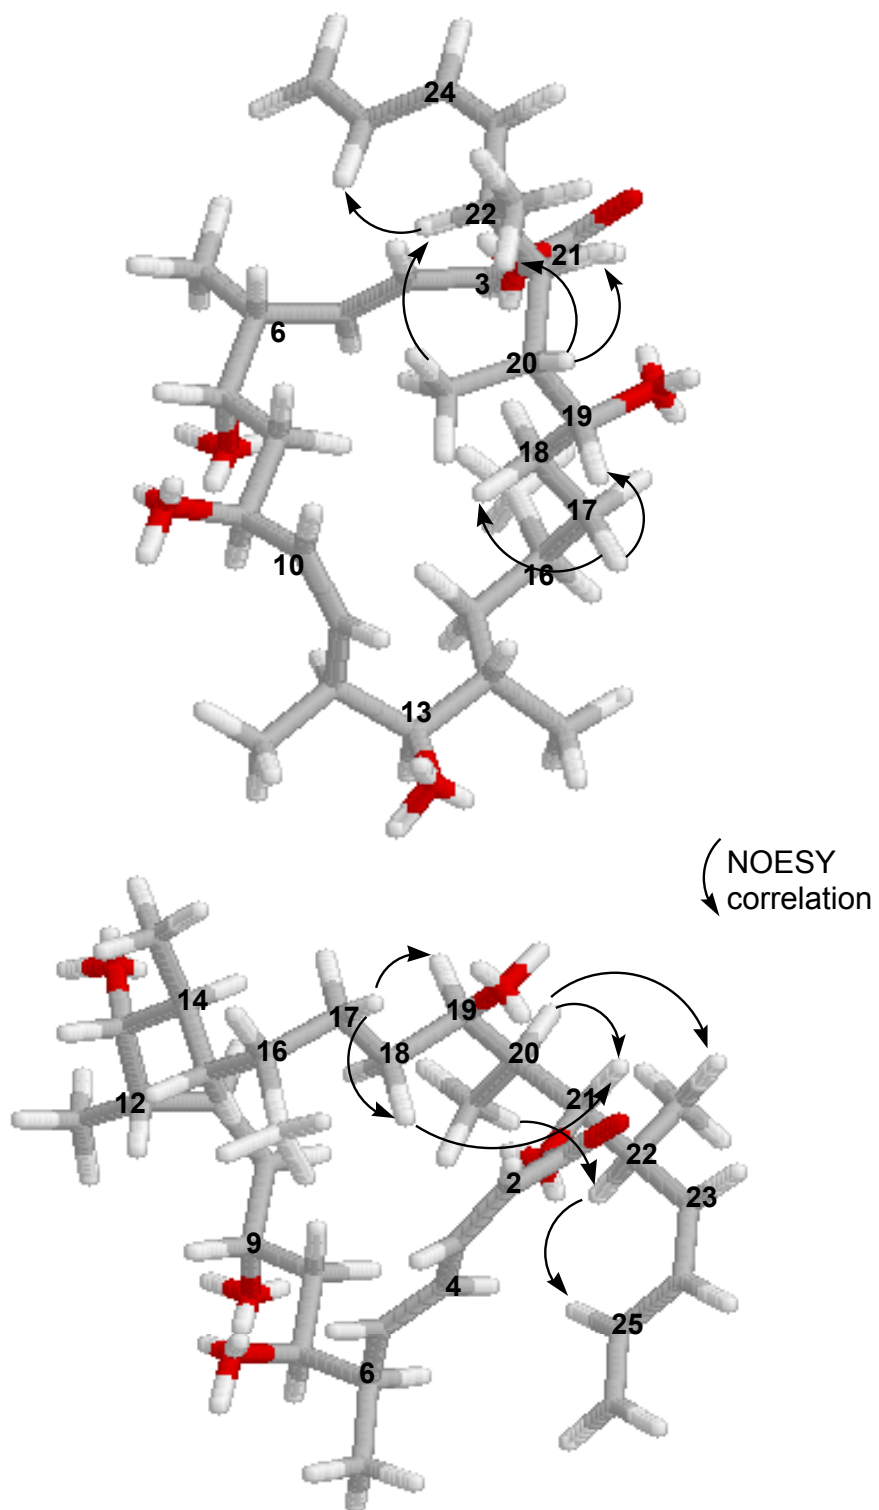

**PDB output-file for the lowest energy  
conformation of dictyostatin (5)**

|        |    |      |     |   |         |        |        |      |      |    |
|--------|----|------|-----|---|---------|--------|--------|------|------|----|
| HETATM | 1  | C1   | UNK | 1 | -24.571 | 52.715 | 30.382 | 1.00 | 0.00 | C  |
| HETATM | 2  | O1   | UNK | 1 | -24.846 | 52.072 | 31.612 | 1.00 | 0.00 | O  |
| HETATM | 3  | C5   | UNK | 1 | -24.897 | 54.220 | 30.500 | 1.00 | 0.00 | C  |
| HETATM | 4  | C6   | UNK | 1 | -25.350 | 52.020 | 29.243 | 1.00 | 0.00 | C  |
| HETATM | 5  | C7   | UNK | 1 | -24.755 | 50.656 | 28.829 | 1.00 | 0.00 | C  |
| HETATM | 6  | O2   | UNK | 1 | -24.583 | 49.874 | 29.995 | 1.00 | 0.00 | O  |
| HETATM | 7  | C8   | UNK | 1 | -23.454 | 50.814 | 28.072 | 1.00 | 0.00 | C  |
| HETATM | 8  | C9   | UNK | 1 | -22.769 | 49.852 | 27.432 | 1.00 | 0.00 | C  |
| HETATM | 9  | C10  | UNK | 1 | -23.129 | 48.387 | 27.318 | 1.00 | 0.00 | C  |
| HETATM | 10 | C11  | UNK | 1 | -23.263 | 47.945 | 25.841 | 1.00 | 0.00 | C  |
| HETATM | 11 | C12  | UNK | 1 | -24.449 | 48.621 | 25.097 | 1.00 | 0.00 | C  |
| HETATM | 12 | C13  | UNK | 1 | -25.802 | 48.044 | 25.579 | 1.00 | 0.00 | C  |
| HETATM | 13 | C14  | UNK | 1 | -27.094 | 48.634 | 24.969 | 1.00 | 0.00 | C  |
| HETATM | 14 | C15  | UNK | 1 | -27.198 | 50.154 | 25.207 | 1.00 | 0.00 | C  |
| HETATM | 15 | C16  | UNK | 1 | -28.449 | 50.806 | 24.598 | 1.00 | 0.00 | C  |
| HETATM | 16 | C17  | UNK | 1 | -28.425 | 52.349 | 24.643 | 1.00 | 0.00 | C  |
| HETATM | 17 | C18  | UNK | 1 | -28.242 | 52.983 | 26.047 | 1.00 | 0.00 | C  |
| HETATM | 18 | C19  | UNK | 1 | -28.130 | 54.535 | 25.996 | 1.00 | 0.00 | C  |
| HETATM | 19 | C20  | UNK | 1 | -26.841 | 55.046 | 25.302 | 1.00 | 0.00 | C  |
| HETATM | 20 | C21  | UNK | 1 | -25.600 | 54.606 | 26.050 | 1.00 | 0.00 | C  |
| HETATM | 21 | C22  | UNK | 1 | -24.651 | 53.746 | 25.647 | 1.00 | 0.00 | C  |
| HETATM | 22 | C23  | UNK | 1 | -24.597 | 53.054 | 24.353 | 1.00 | 0.00 | C  |
| HETATM | 23 | C24  | UNK | 1 | -23.657 | 52.137 | 24.086 | 1.00 | 0.00 | C  |
| HETATM | 24 | C25  | UNK | 1 | -22.083 | 47.552 | 28.080 | 1.00 | 0.00 | C  |
| HETATM | 25 | O4   | UNK | 1 | -22.036 | 48.206 | 25.184 | 1.00 | 0.00 | O  |
| HETATM | 26 | C26  | UNK | 1 | -24.324 | 48.485 | 23.568 | 1.00 | 0.00 | C  |
| HETATM | 27 | O5   | UNK | 1 | -29.615 | 52.841 | 24.053 | 1.00 | 0.00 | O  |
| HETATM | 28 | C29  | UNK | 1 | -29.358 | 52.524 | 27.008 | 1.00 | 0.00 | C  |
| HETATM | 29 | O6   | UNK | 1 | -28.140 | 55.055 | 27.319 | 1.00 | 0.00 | O  |
| HETATM | 30 | C30  | UNK | 1 | -26.835 | 56.581 | 25.170 | 1.00 | 0.00 | C  |
| HETATM | 31 | C32  | UNK | 1 | -24.095 | 54.908 | 31.617 | 1.00 | 0.00 | C  |
| HETATM | 32 | C1   | UNK | 1 | -26.373 | 54.466 | 30.713 | 1.00 | 0.00 | C  |
| HETATM | 33 | C2   | UNK | 1 | -27.120 | 55.231 | 29.903 | 1.00 | 0.00 | C  |
| HETATM | 34 | C3   | UNK | 1 | -28.534 | 55.510 | 30.178 | 1.00 | 0.00 | C  |
| HETATM | 35 | C4   | UNK | 1 | -29.479 | 55.769 | 29.259 | 1.00 | 0.00 | C  |
| HETATM | 36 | C5   | UNK | 1 | -29.275 | 55.669 | 27.787 | 1.00 | 0.00 | C  |
| HETATM | 37 | O1   | UNK | 1 | -30.186 | 56.059 | 27.076 | 1.00 | 0.00 | O  |
| HETATM | 38 | H14  | UNK | 1 | -28.311 | 47.888 | 25.552 | 1.00 | 0.00 | C  |
| HETATM | 39 | LP76 | UNK | 1 | -24.451 | 52.285 | 32.013 | 1.00 | 0.00 | Lp |
| HETATM | 40 | LP76 | UNK | 1 | -25.444 | 52.048 | 31.666 | 1.00 | 0.00 | Lp |
| HETATM | 41 | LP76 | UNK | 1 | -24.049 | 50.030 | 30.228 | 1.00 | 0.00 | Lp |
| HETATM | 42 | LP76 | UNK | 1 | -25.111 | 49.882 | 30.285 | 1.00 | 0.00 | Lp |
| HETATM | 43 | LP76 | UNK | 1 | -22.067 | 48.767 | 24.972 | 1.00 | 0.00 | Lp |
| HETATM | 44 | LP76 | UNK | 1 | -21.602 | 47.967 | 25.525 | 1.00 | 0.00 | Lp |
| HETATM | 45 | LP76 | UNK | 1 | -30.070 | 52.560 | 24.327 | 1.00 | 0.00 | Lp |
| HETATM | 46 | LP76 | UNK | 1 | -29.539 | 53.434 | 23.984 | 1.00 | 0.00 | Lp |
| HETATM | 47 | LP76 | UNK | 1 | -28.068 | 54.565 | 27.661 | 1.00 | 0.00 | Lp |
| HETATM | 48 | LP76 | UNK | 1 | -27.732 | 55.497 | 27.297 | 1.00 | 0.00 | Lp |
| HETATM | 49 | H1   | UNK | 1 | -23.473 | 52.615 | 30.203 | 1.00 | 0.00 | H  |
| HETATM | 50 | H4   | UNK | 1 | -24.584 | 54.695 | 29.539 | 1.00 | 0.00 | H  |
| HETATM | 51 | H5   | UNK | 1 | -26.409 | 51.879 | 29.564 | 1.00 | 0.00 | H  |
| HETATM | 52 | H6   | UNK | 1 | -25.389 | 52.679 | 28.345 | 1.00 | 0.00 | H  |
| HETATM | 53 | H7   | UNK | 1 | -25.486 | 50.128 | 28.169 | 1.00 | 0.00 | H  |

|        |     |      |     |    |         |        |        |      |      |   |
|--------|-----|------|-----|----|---------|--------|--------|------|------|---|
| HETATM | 54  | H8   | UNK | 1  | -24.475 | 48.963 | 29.757 | 1.00 | 0.00 | H |
| HETATM | 55  | H9   | UNK | 1  | -23.024 | 51.829 | 28.045 | 1.00 | 0.00 | H |
| HETATM | 56  | H10  | UNK | 1  | -21.829 | 50.147 | 26.935 | 1.00 | 0.00 | H |
| HETATM | 57  | H11  | UNK | 1  | -24.099 | 48.196 | 27.828 | 1.00 | 0.00 | H |
| HETATM | 58  | H12  | UNK | 1  | -23.410 | 46.837 | 25.801 | 1.00 | 0.00 | H |
| HETATM | 59  | H13  | UNK | 1  | -24.407 | 49.707 | 25.342 | 1.00 | 0.00 | H |
| HETATM | 60  | H16  | UNK | 1  | -26.312 | 50.659 | 24.759 | 1.00 | 0.00 | H |
| HETATM | 61  | H18  | UNK | 1  | -27.588 | 52.670 | 23.980 | 1.00 | 0.00 | H |
| HETATM | 62  | H19  | UNK | 1  | -27.281 | 52.610 | 26.474 | 1.00 | 0.00 | H |
| HETATM | 63  | H20  | UNK | 1  | -29.004 | 54.928 | 25.426 | 1.00 | 0.00 | H |
| HETATM | 64  | H21  | UNK | 1  | -26.828 | 54.660 | 24.259 | 1.00 | 0.00 | H |
| HETATM | 65  | H22  | UNK | 1  | -25.477 | 55.049 | 27.053 | 1.00 | 0.00 | H |
| HETATM | 66  | H23  | UNK | 1  | -23.822 | 53.557 | 26.350 | 1.00 | 0.00 | H |
| HETATM | 67  | H24  | UNK | 1  | -25.319 | 53.293 | 23.557 | 1.00 | 0.00 | H |
| HETATM | 68  | H25  | UNK | 1  | -23.618 | 51.634 | 23.106 | 1.00 | 0.00 | H |
| HETATM | 69  | H26  | UNK | 1  | -22.895 | 51.849 | 24.829 | 1.00 | 0.00 | H |
| HETATM | 70  | H27  | UNK | 1  | -22.044 | 47.846 | 29.155 | 1.00 | 0.00 | H |
| HETATM | 71  | H28  | UNK | 1  | -22.327 | 46.466 | 28.041 | 1.00 | 0.00 | H |
| HETATM | 72  | H29  | UNK | 1  | -21.060 | 47.684 | 27.661 | 1.00 | 0.00 | H |
| HETATM | 73  | H30  | UNK | 1  | -21.986 | 47.674 | 24.400 | 1.00 | 0.00 | H |
| HETATM | 74  | H31  | UNK | 1  | -25.132 | 49.029 | 23.031 | 1.00 | 0.00 | H |
| HETATM | 75  | H32  | UNK | 1  | -24.358 | 47.416 | 23.257 | 1.00 | 0.00 | H |
| HETATM | 76  | H33  | UNK | 1  | -23.377 | 48.925 | 23.182 | 1.00 | 0.00 | H |
| HETATM | 77  | H40  | UNK | 1  | -29.665 | 52.526 | 23.158 | 1.00 | 0.00 | H |
| HETATM | 78  | H41  | UNK | 1  | -29.422 | 51.416 | 27.082 | 1.00 | 0.00 | H |
| HETATM | 79  | H42  | UNK | 1  | -29.187 | 52.867 | 28.053 | 1.00 | 0.00 | H |
| HETATM | 80  | H43  | UNK | 1  | -30.352 | 52.905 | 26.680 | 1.00 | 0.00 | H |
| HETATM | 81  | H44  | UNK | 1  | -25.933 | 56.930 | 24.614 | 1.00 | 0.00 | H |
| HETATM | 82  | H45  | UNK | 1  | -27.730 | 56.941 | 24.612 | 1.00 | 0.00 | H |
| HETATM | 83  | H46  | UNK | 1  | -26.831 | 57.090 | 26.161 | 1.00 | 0.00 | H |
| HETATM | 84  | H50  | UNK | 1  | -24.365 | 54.511 | 32.622 | 1.00 | 0.00 | H |
| HETATM | 85  | H51  | UNK | 1  | -23.000 | 54.763 | 31.476 | 1.00 | 0.00 | H |
| HETATM | 86  | H52  | UNK | 1  | -24.288 | 56.006 | 31.629 | 1.00 | 0.00 | H |
| HETATM | 87  | H1   | UNK | 1  | -24.595 | 51.160 | 31.533 | 1.00 | 0.00 | H |
| HETATM | 88  | 1H13 | UNK | 1  | -25.790 | 46.946 | 25.382 | 1.00 | 0.00 | H |
| HETATM | 89  | 2H13 | UNK | 1  | -25.889 | 48.163 | 26.682 | 1.00 | 0.00 | H |
| HETATM | 90  | 1H16 | UNK | 1  | -28.528 | 50.485 | 23.532 | 1.00 | 0.00 | H |
| HETATM | 91  | 2H16 | UNK | 1  | -29.370 | 50.434 | 25.100 | 1.00 | 0.00 | H |
| HETATM | 92  | H1   | UNK | 1  | -26.841 | 53.978 | 31.584 | 1.00 | 0.00 | H |
| HETATM | 93  | H2   | UNK | 1  | -26.622 | 55.750 | 29.071 | 1.00 | 0.00 | H |
| HETATM | 94  | H3   | UNK | 1  | -28.820 | 55.613 | 31.239 | 1.00 | 0.00 | H |
| HETATM | 95  | H4   | UNK | 1  | -30.483 | 56.064 | 29.608 | 1.00 | 0.00 | H |
| HETATM | 96  | H14  | UNK | 1  | -27.096 | 48.441 | 23.869 | 1.00 | 0.00 | H |
| HETATM | 97  | H15  | UNK | 1  | -27.167 | 50.340 | 26.305 | 1.00 | 0.00 | H |
| HETATM | 98  | 1H14 | UNK | 1  | -29.257 | 48.160 | 25.033 | 1.00 | 0.00 | H |
| HETATM | 99  | 2H14 | UNK | 1  | -28.203 | 46.784 | 25.441 | 1.00 | 0.00 | H |
| HETATM | 100 | 3H14 | UNK | 1  | -28.437 | 48.109 | 26.637 | 1.00 | 0.00 | H |
| CONECT | 1   | 2    | 3   | 4  | 49      |        |        |      |      |   |
| CONECT | 2   | 1    | 87  | 39 | 40      |        |        |      |      |   |
| CONECT | 3   | 1    | 31  | 50 | 32      |        |        |      |      |   |
| CONECT | 4   | 1    | 5   | 51 | 52      |        |        |      |      |   |
| CONECT | 5   | 4    | 6   | 7  | 53      |        |        |      |      |   |
| CONECT | 6   | 5    | 54  | 41 | 42      |        |        |      |      |   |
| CONECT | 7   | 5    | 8   | 55 |         |        |        |      |      |   |
| CONECT | 7   | 8    |     |    |         |        |        |      |      |   |
| CONECT | 8   | 7    | 9   | 56 |         |        |        |      |      |   |
| CONECT | 8   | 7    |     |    |         |        |        |      |      |   |
| CONECT | 9   | 8    | 10  | 24 | 57      |        |        |      |      |   |
| CONECT | 10  | 9    | 11  | 25 | 58      |        |        |      |      |   |
| CONECT | 11  | 10   | 12  | 26 | 59      |        |        |      |      |   |

|         |    |    |    |    |    |
|---------|----|----|----|----|----|
| CONNECT | 12 | 11 | 13 | 88 | 89 |
| CONNECT | 13 | 12 | 14 | 38 | 96 |
| CONNECT | 14 | 13 | 15 | 60 | 97 |
| CONNECT | 15 | 14 | 16 | 90 | 91 |
| CONNECT | 16 | 15 | 17 | 27 | 61 |
| CONNECT | 17 | 16 | 18 | 28 | 62 |
| CONNECT | 18 | 17 | 19 | 29 | 63 |
| CONNECT | 19 | 18 | 20 | 30 | 64 |
| CONNECT | 20 | 19 | 21 | 65 |    |
| CONNECT | 20 | 21 |    |    |    |
| CONNECT | 21 | 20 | 22 | 66 |    |
| CONNECT | 21 | 20 |    |    |    |
| CONNECT | 22 | 21 | 23 | 67 |    |
| CONNECT | 22 | 23 |    |    |    |
| CONNECT | 23 | 22 | 68 | 69 |    |
| CONNECT | 23 | 22 |    |    |    |
| CONNECT | 24 | 9  | 70 | 71 | 72 |
| CONNECT | 25 | 10 | 73 | 43 | 44 |
| CONNECT | 26 | 11 | 74 | 75 | 76 |
| CONNECT | 27 | 16 | 77 | 45 | 46 |
| CONNECT | 28 | 17 | 78 | 79 | 80 |
| CONNECT | 29 | 18 | 36 | 47 | 48 |
| CONNECT | 30 | 19 | 81 | 82 | 83 |
| CONNECT | 31 | 3  | 84 | 85 | 86 |
| CONNECT | 49 | 1  |    |    |    |
| CONNECT | 50 | 3  |    |    |    |
| CONNECT | 51 | 4  |    |    |    |
| CONNECT | 52 | 4  |    |    |    |
| CONNECT | 53 | 5  |    |    |    |
| CONNECT | 54 | 6  |    |    |    |
| CONNECT | 55 | 7  |    |    |    |
| CONNECT | 56 | 8  |    |    |    |
| CONNECT | 57 | 9  |    |    |    |
| CONNECT | 58 | 10 |    |    |    |
| CONNECT | 59 | 11 |    |    |    |
| CONNECT | 60 | 14 |    |    |    |
| CONNECT | 61 | 16 |    |    |    |
| CONNECT | 62 | 17 |    |    |    |
| CONNECT | 63 | 18 |    |    |    |
| CONNECT | 64 | 19 |    |    |    |
| CONNECT | 65 | 20 |    |    |    |
| CONNECT | 66 | 21 |    |    |    |
| CONNECT | 67 | 22 |    |    |    |
| CONNECT | 68 | 23 |    |    |    |
| CONNECT | 69 | 23 |    |    |    |
| CONNECT | 70 | 24 |    |    |    |
| CONNECT | 71 | 24 |    |    |    |
| CONNECT | 72 | 24 |    |    |    |
| CONNECT | 73 | 25 |    |    |    |
| CONNECT | 74 | 26 |    |    |    |
| CONNECT | 75 | 26 |    |    |    |
| CONNECT | 76 | 26 |    |    |    |
| CONNECT | 77 | 27 |    |    |    |
| CONNECT | 78 | 28 |    |    |    |
| CONNECT | 79 | 28 |    |    |    |
| CONNECT | 80 | 28 |    |    |    |
| CONNECT | 81 | 30 |    |    |    |
| CONNECT | 82 | 30 |    |    |    |
| CONNECT | 83 | 30 |    |    |    |
| CONNECT | 84 | 31 |    |    |    |

|         |     |    |    |    |     |
|---------|-----|----|----|----|-----|
| CONNECT | 85  | 31 |    |    |     |
| CONNECT | 86  | 31 |    |    |     |
| CONNECT | 32  | 3  | 33 | 92 |     |
| CONNECT | 32  | 33 |    |    |     |
| CONNECT | 33  | 32 | 34 | 93 |     |
| CONNECT | 33  | 32 |    |    |     |
| CONNECT | 34  | 33 | 35 | 94 |     |
| CONNECT | 34  | 35 |    |    |     |
| CONNECT | 35  | 34 | 36 | 95 |     |
| CONNECT | 35  | 34 |    |    |     |
| CONNECT | 36  | 29 | 35 | 37 |     |
| CONNECT | 36  | 37 |    |    |     |
| CONNECT | 37  | 36 |    |    |     |
| CONNECT | 37  | 36 |    |    |     |
| CONNECT | 87  | 2  |    |    |     |
| CONNECT | 88  | 12 |    |    |     |
| CONNECT | 89  | 12 |    |    |     |
| CONNECT | 38  | 13 | 98 | 99 | 100 |
| CONNECT | 90  | 15 |    |    |     |
| CONNECT | 91  | 15 |    |    |     |
| CONNECT | 92  | 32 |    |    |     |
| CONNECT | 93  | 33 |    |    |     |
| CONNECT | 94  | 34 |    |    |     |
| CONNECT | 95  | 35 |    |    |     |
| CONNECT | 96  | 13 |    |    |     |
| CONNECT | 97  | 14 |    |    |     |
| CONNECT | 98  | 38 |    |    |     |
| CONNECT | 99  | 38 |    |    |     |
| CONNECT | 100 | 38 |    |    |     |
| CONNECT | 39  | 2  |    |    |     |
| CONNECT | 40  | 2  |    |    |     |
| CONNECT | 41  | 6  |    |    |     |
| CONNECT | 42  | 6  |    |    |     |
| CONNECT | 43  | 25 |    |    |     |
| CONNECT | 44  | 25 |    |    |     |
| CONNECT | 45  | 27 |    |    |     |
| CONNECT | 46  | 27 |    |    |     |
| CONNECT | 47  | 29 |    |    |     |
| CONNECT | 48  | 29 |    |    |     |
| END     |     |    |    |    |     |
